# Supplementary material for: The Food Additive β-Caryophyllene Exerts Its Neuroprotective Effects Through the JAK2-STAT3-BACE1 Pathway
Source: Front Aging Neurosci. 2022 Feb 28;14:814432. doi: 10.3389/fnagi.2022.814432 (PMC8919047; doi:10.3389/fnagi.2022.814432)
Supplement: Supplementary file 6 [file Table_3.xlsx]

## Sheet: Sheet1
Table 3 Effects of different concentrations of BCP on the 24-h viability of PC-12 cells
Treatment	Neuronal survival (% CCK-8 reduction)
CNa	98.06±0.64
5 μM BCPb	100.2±0.65ns
10 μM BCPb	102.8±0.62*
15 μM BCPb	103.3±0.86*
20 μM BCPb	104.2±0.76*
25 μM BCPb	106.5±0.79**
a the control group without special treatment.
b the group incubated with different concentrations of BCP for 24 h.
ns: no significant difference vs CN.
** p<0.01, * p<0.05 vs CN.
